# Supplementary material for: Modeling of type IV and V sigmoidal adsorption isotherms
Source: Royal Society of Chemistry journal article supplement (doi:10.1039/c8cp07751g), 2019-01-01
Supplement: c8cp07751g1.pdf [file c8cp07751g1.pdf]

### Supplementary Information for

Christoph Buttersack

### Modeling of type IV and V sigmoidal adsorption isotherms

appeared in PCCP 2019

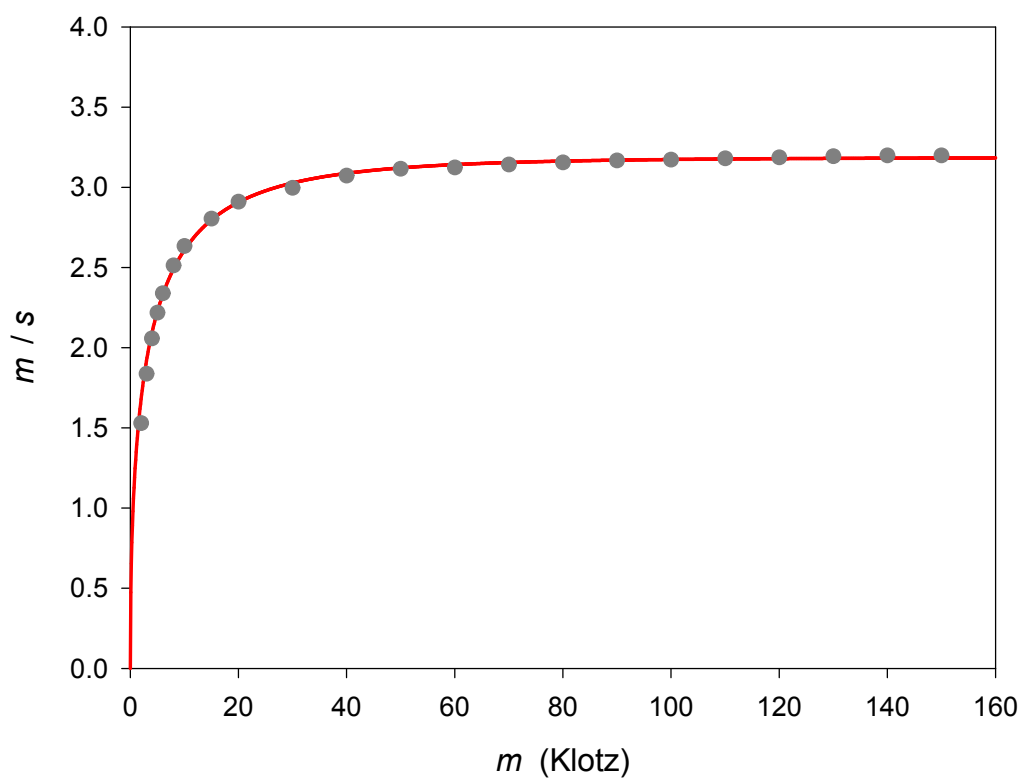

Figure A1: Conversion of the exponent  $m$  of the Klotz equation (20) to the exponent  $s$  of the Sips isotherm (eqn. 12) from non-linear regression in the range of  $\theta = 0.2 \dots 0.8$ .

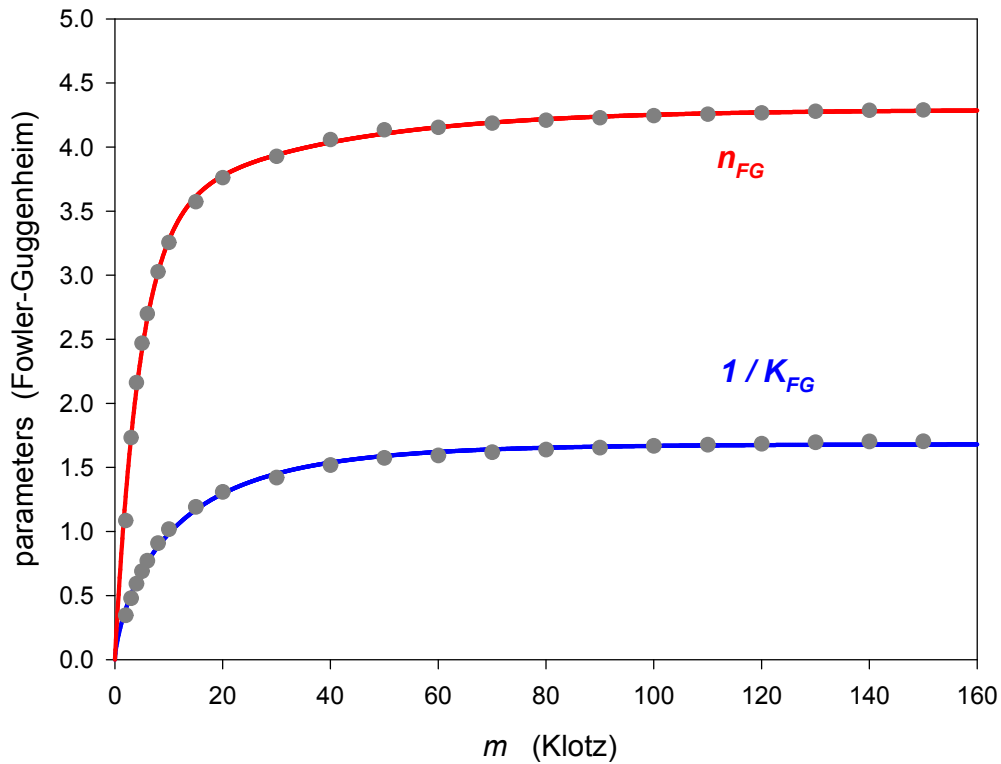

Figure A2: Conversion of the parameter  $m$  of the Klotz equation (20) to the adsorption constant  $K_{FG}$  and the exponent  $n$  of the Fowler-Guggenheim equation (4) from non-linear regression in the range of  $\theta = 0.2 \dots 0.8$ .

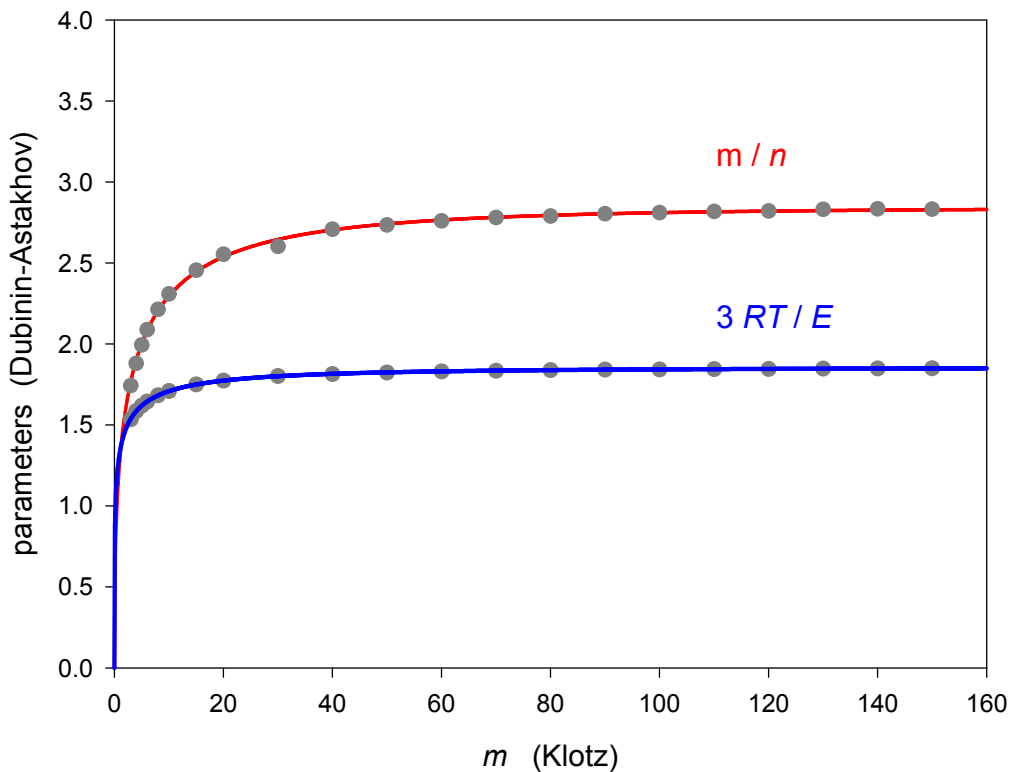

Figure A3: Conversion of the parameters  $m$  of the Klotz equation (20) **with  $K = 5$**  to the energy term  $E / RT$  and the exponent  $n$  of the Dubinin-Astakhov equation (13) from non-linear regression in the range of  $\theta = 0.2 \dots 0.8$ .

$$m/n = 2.84 (1 - \exp(-0.60 m^{0.44})); \quad RT/E = 0.618 (1 - \exp(-1.27 m^{0.30}))$$

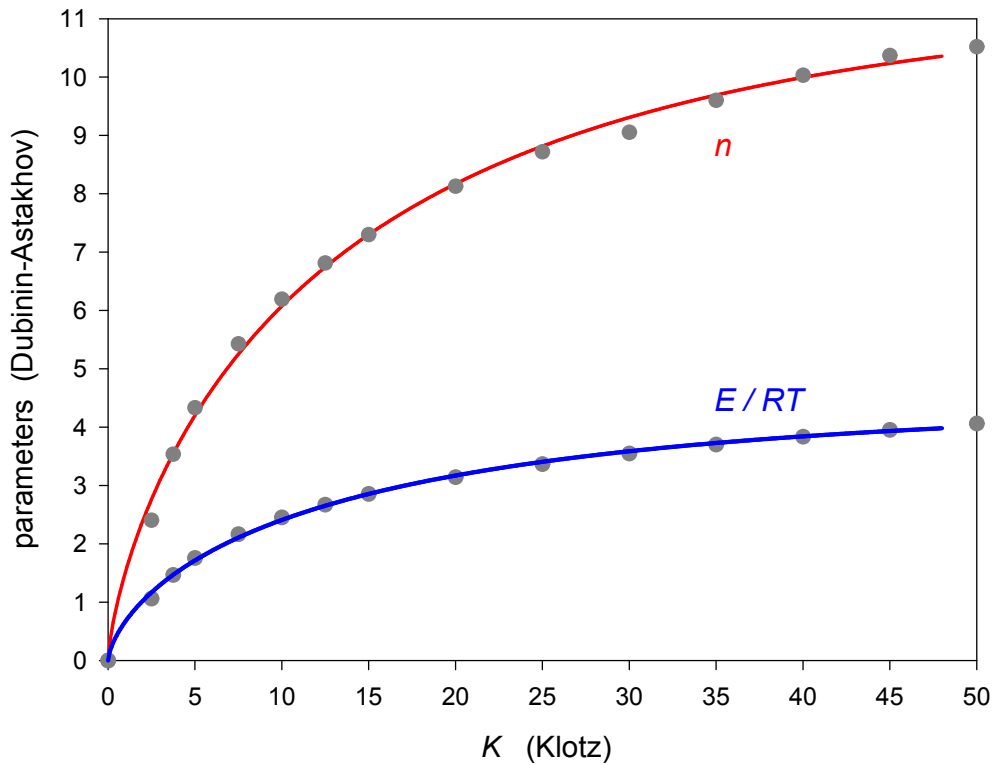

Figure A4: Conversion of the parameters  $K$  of the Klotz equation (20) with  $m = 10$  to the energy term  $E / RT$  and the exponent  $n$  of the Dubinin-Astakhov equation (13) from non-linear regression in the range of  $\theta = 0.2 \dots 0.8$ .

$$n = 11.4 (1 - \exp(-0.14 K^{0.73})); \quad E / RT = 4.4 (1 - \exp(-0.16 K^{0.68}))$$

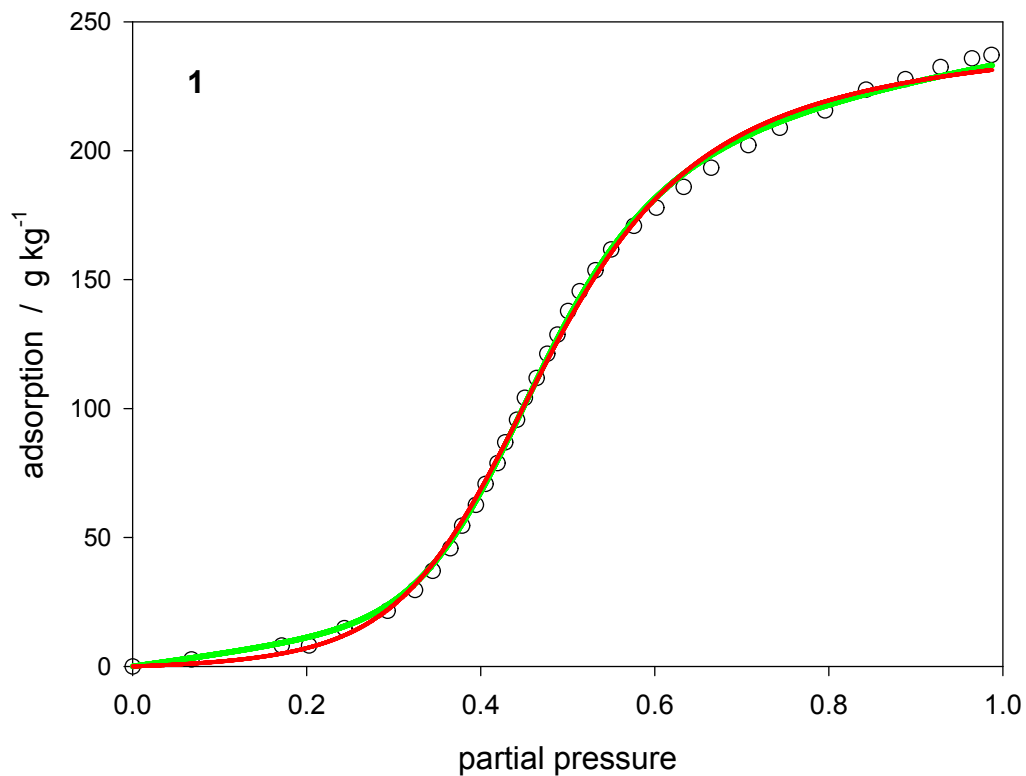

Figure A5: Modeling of the adsorption of water on carbon no. 1 with the Klotz isotherm (eqn. (24)), green line: modeled with eqn. (31)

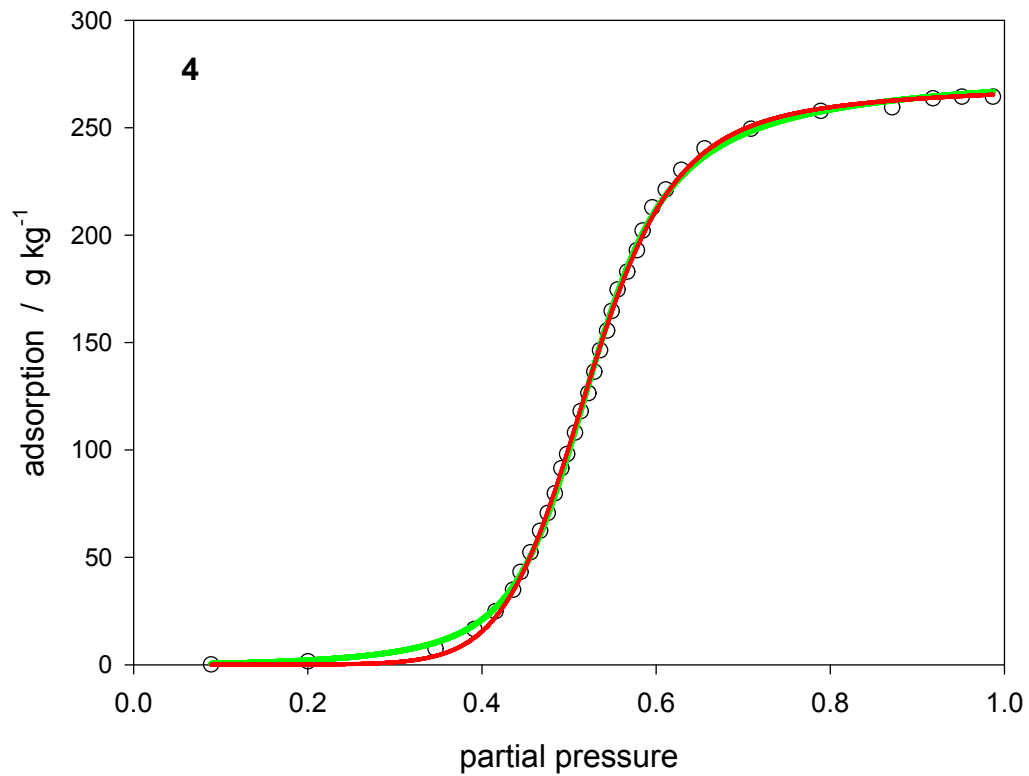

Figure A6: Modeling of the adsorption of water on carbon no. 4 with the Klotz isotherm (eqn. (24)), green line: modeled with eqn. (31).

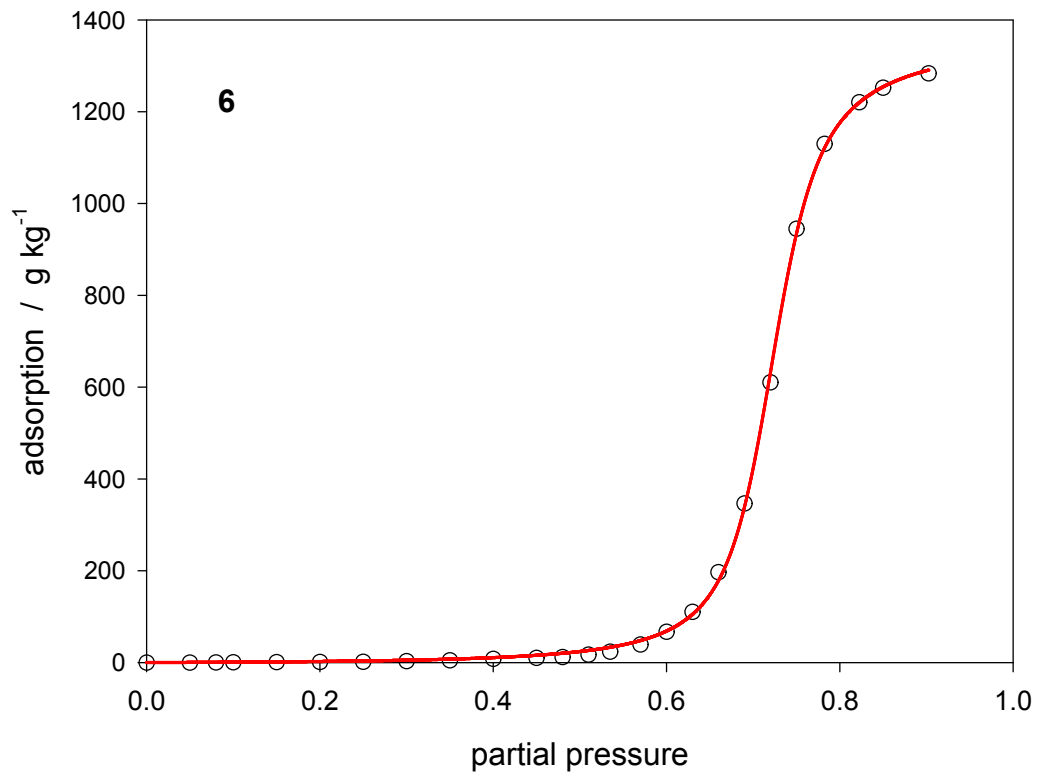

Figure A7: Modeling of the adsorption of water on carbon no. 6 with the Klotz isotherm (eqn. (24)).

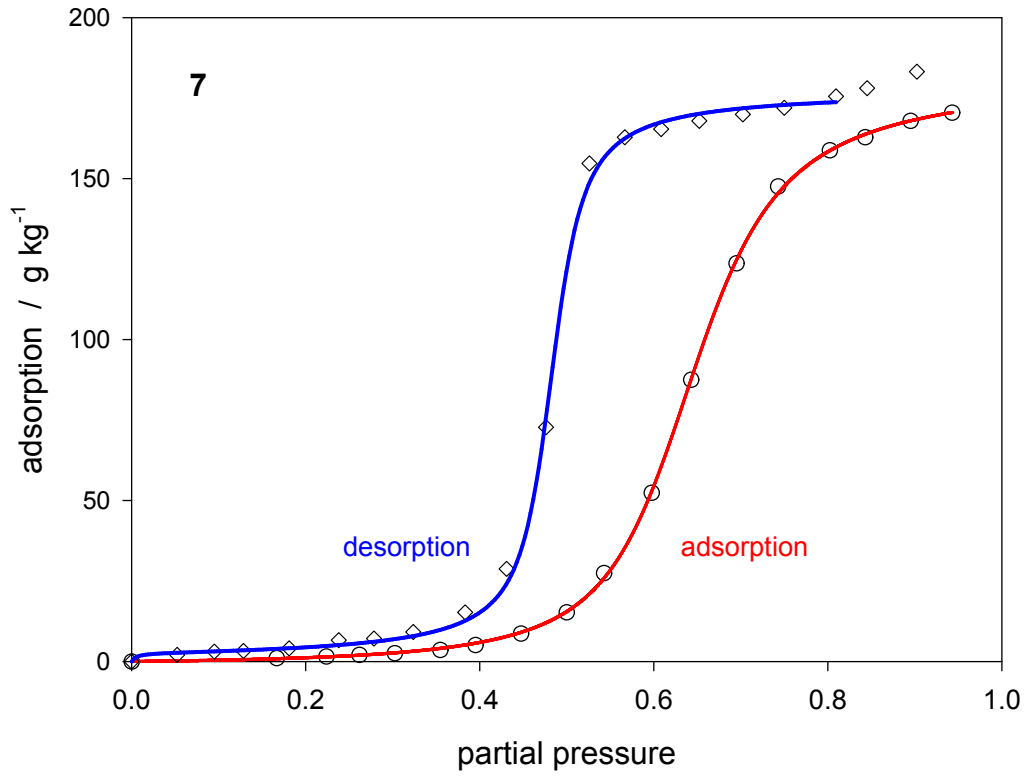

Figure A8: Modeling of the adsorption desorption hysteresis of water on carbon no. 7 with the Klotz isotherm (eqn. (24))

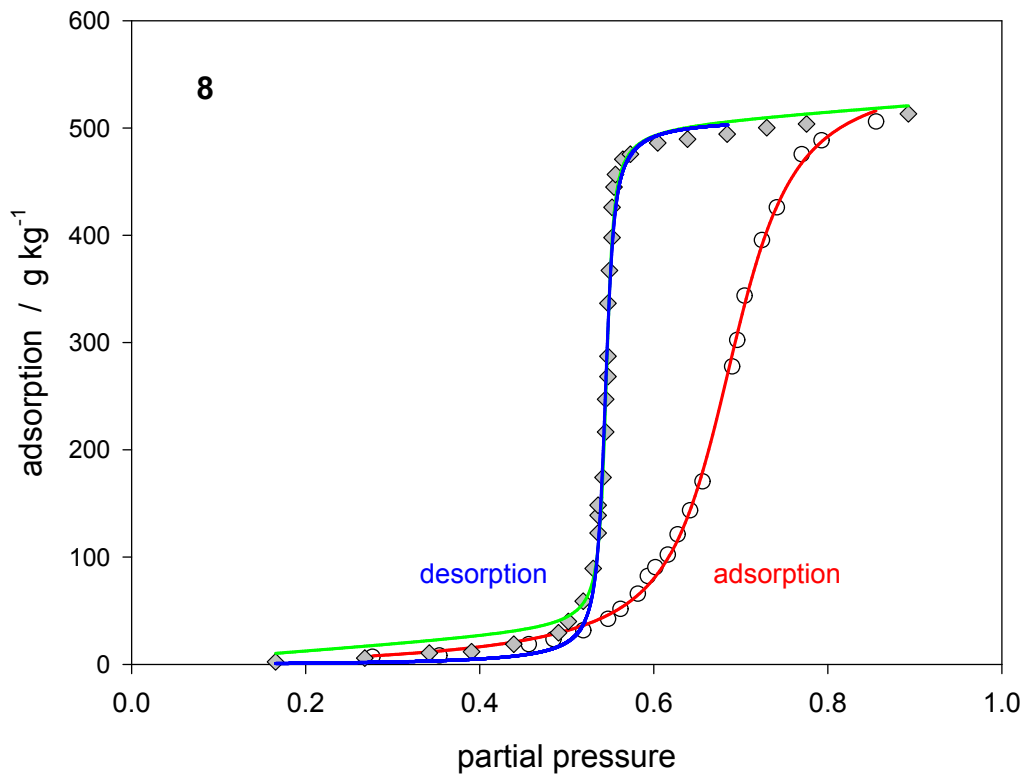

Figure A9: Modeling of the adsorption desorption hysteresis of water on carbon no. 8 with the Klotz isotherm (eqn. (24)), green line: desorption modeled with eqn. (29)

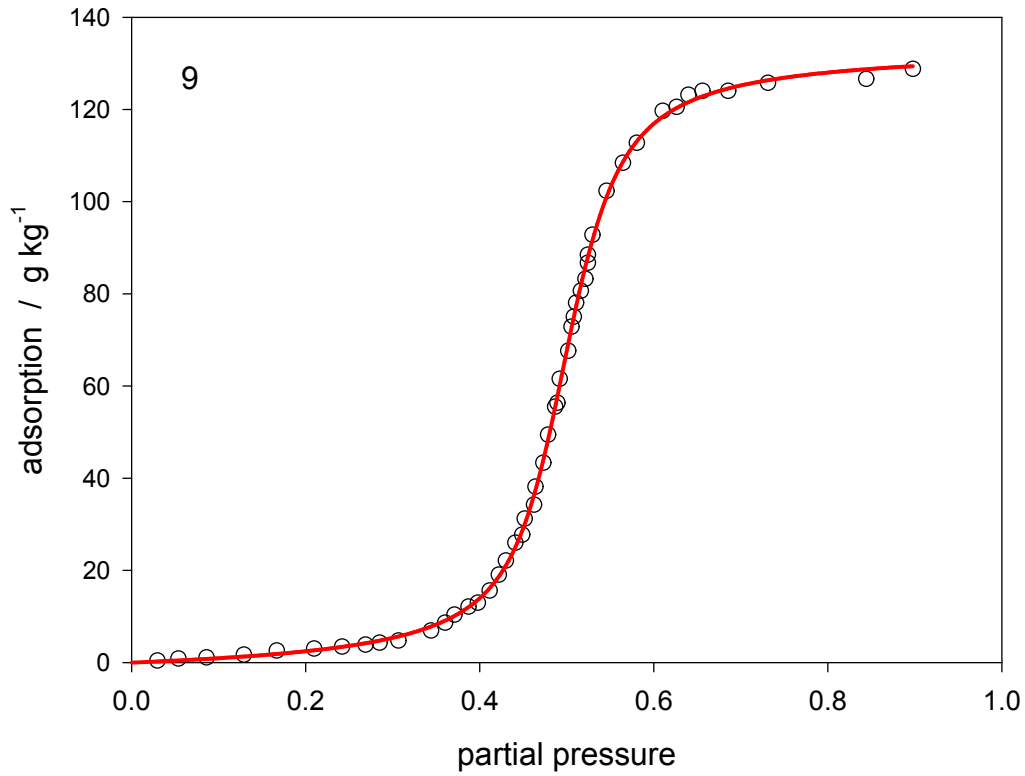

Figure A10: Modeling of the adsorption of water on carbon no. 9 with the Klotz isotherm (eqn. (24)).

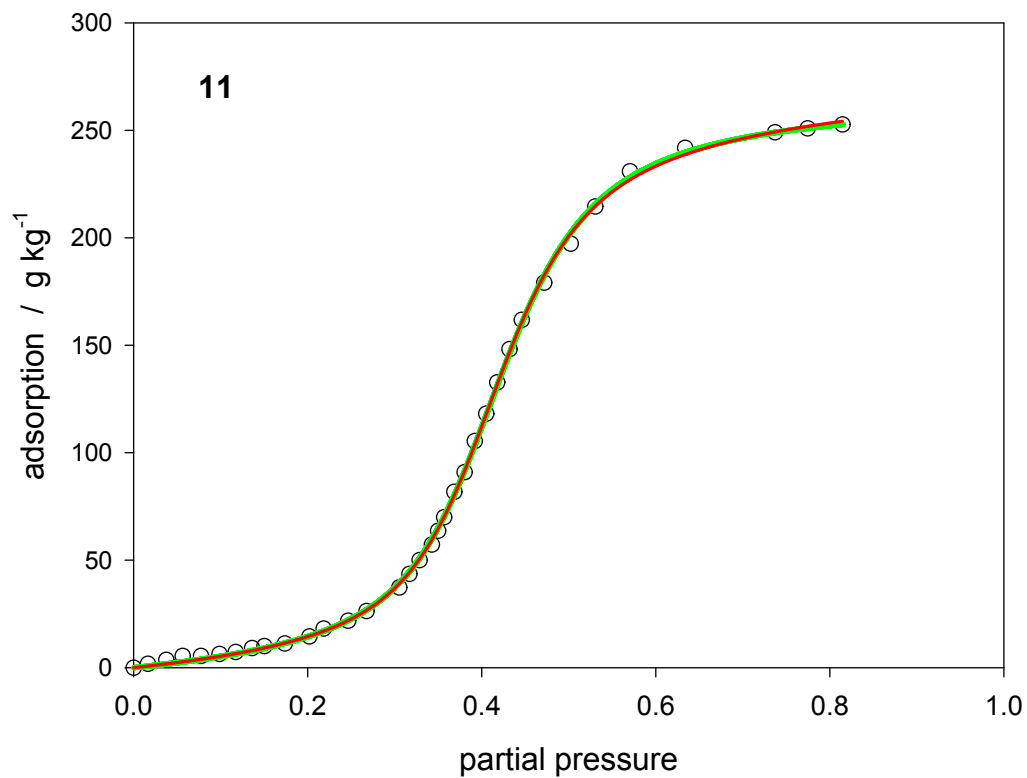

Figure A11: Modeling of the adsorption of water on carbon no. 11 with the Klotz isotherm (eqn. (24)), green line: modeled with eqn. (31).

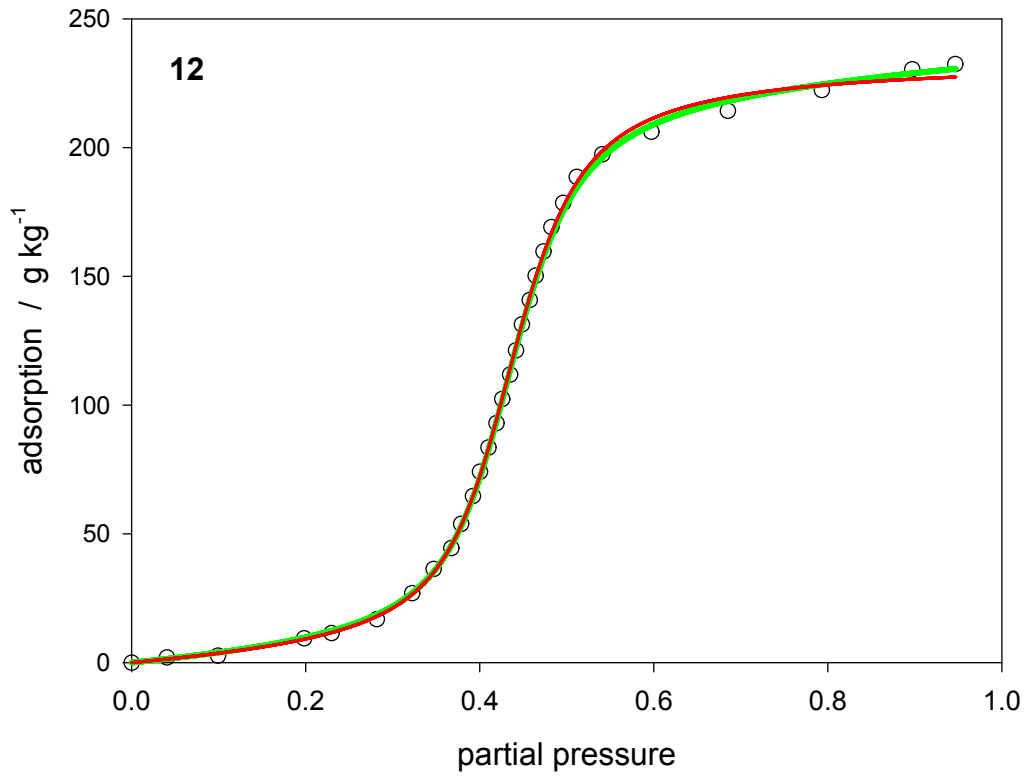

Figure A12: Modeling of the adsorption of water on carbon no. 12 with the Klotz isotherm (eqn. (24)), green line: modeled with eqn. (31).

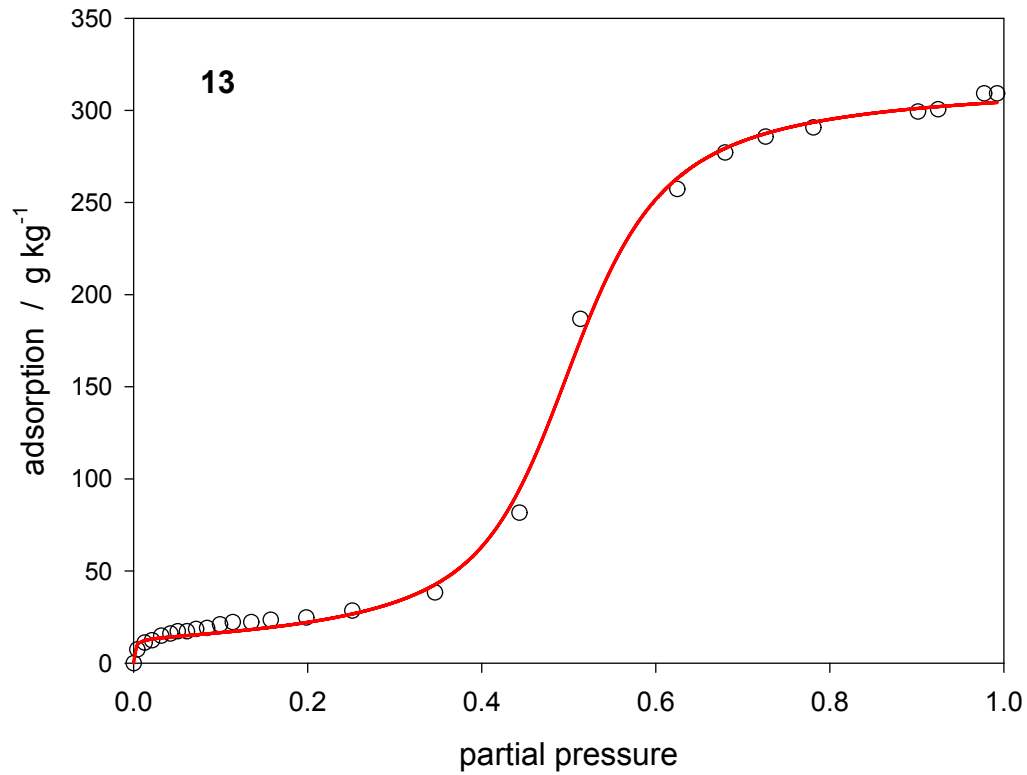

Figure A13: Modeling of the adsorption of water on carbon no. 13 with the Klotz isotherm (eqn. (24)).

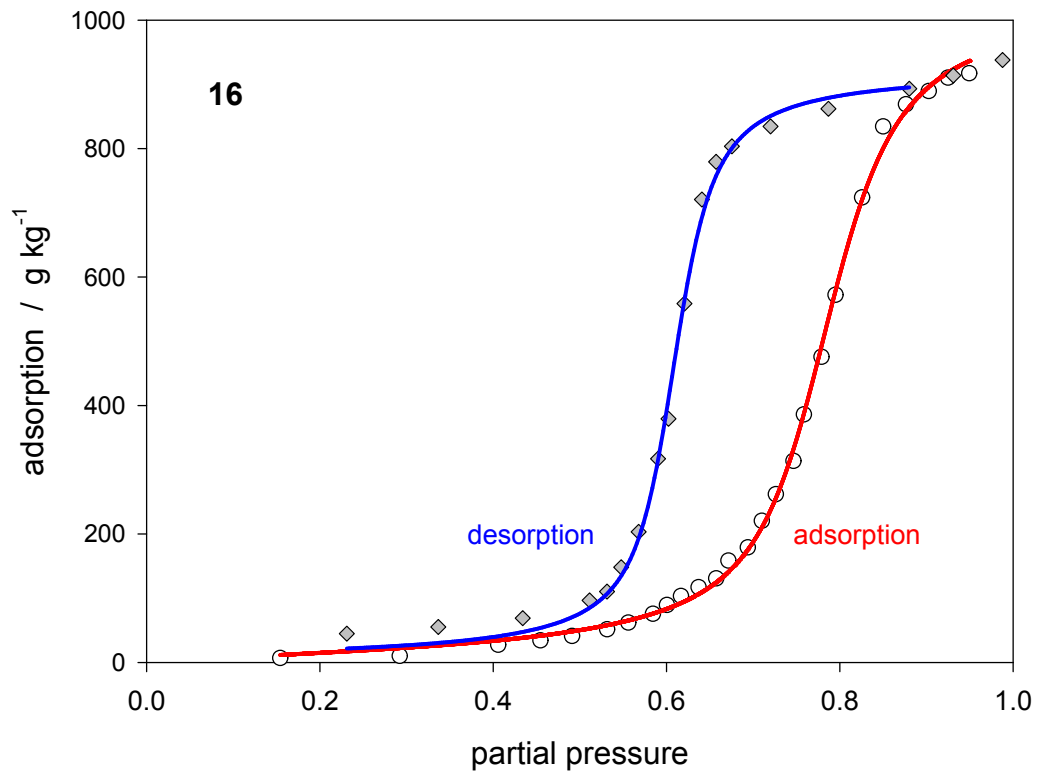

Figure A14: Modeling of the adsorption-desorption hysteresis of water on carbon no. 16 with the Klotz isotherm (eqn. (24))

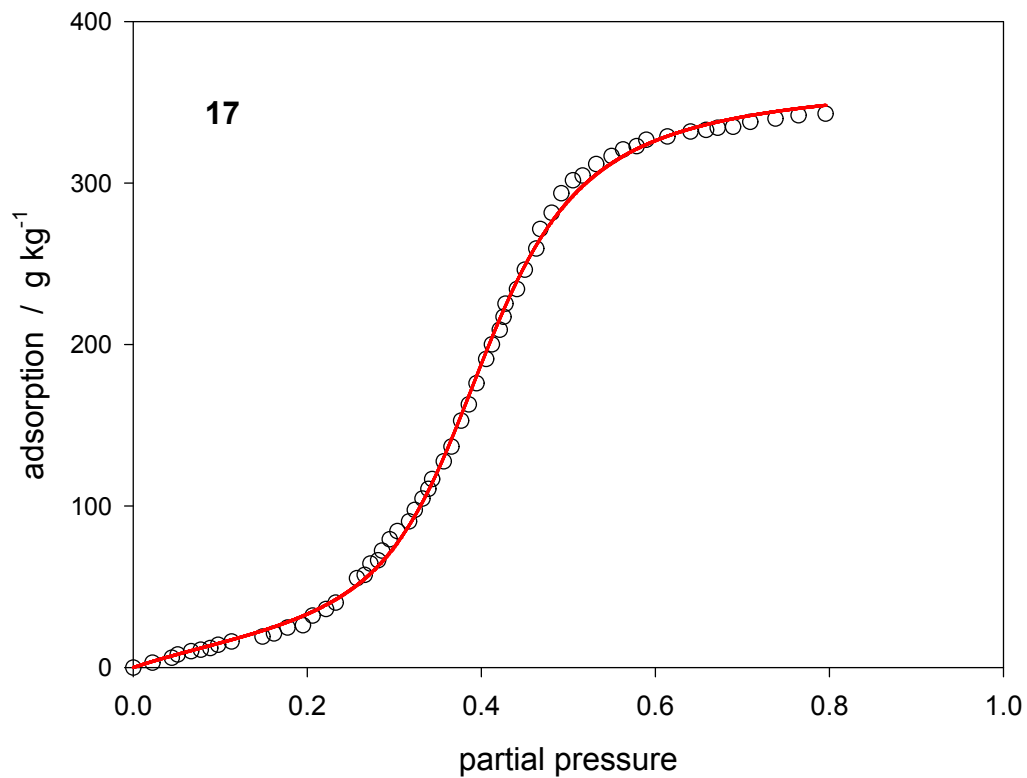

Figure A15: Modeling of the adsorption of water on carbon no. 17 with the Klotz isotherm (eqn. (24)).



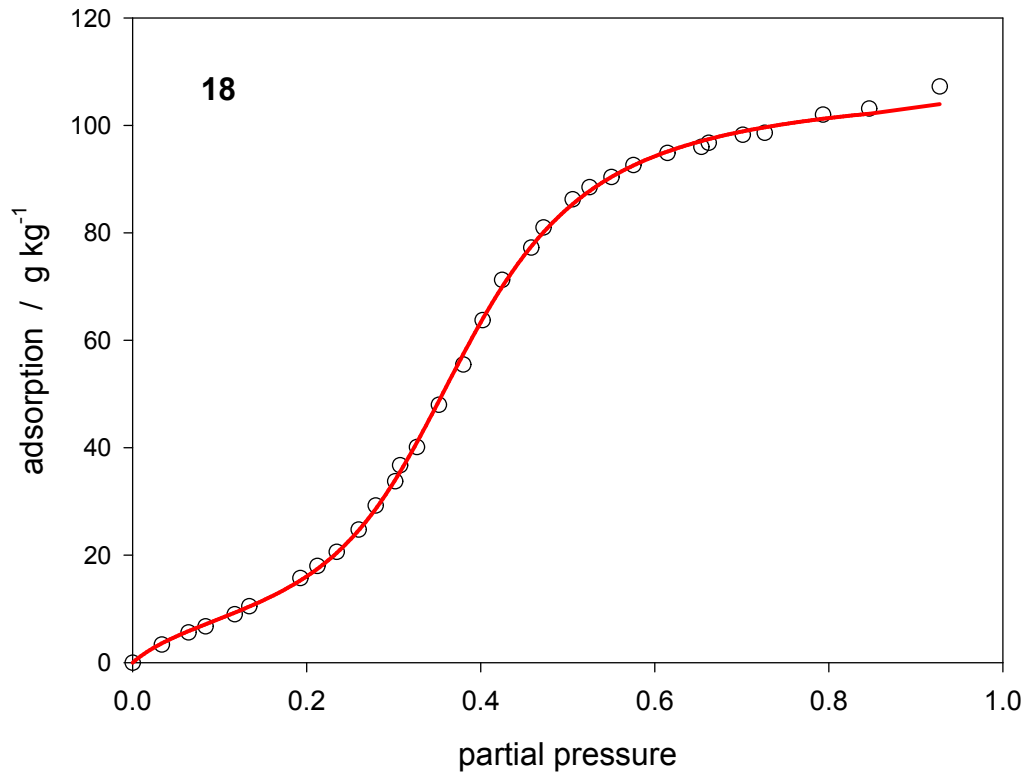

Figure A16: Modeling of the adsorption of water on carbon no. 18 with the Klotz isotherm (eqn. (24)).

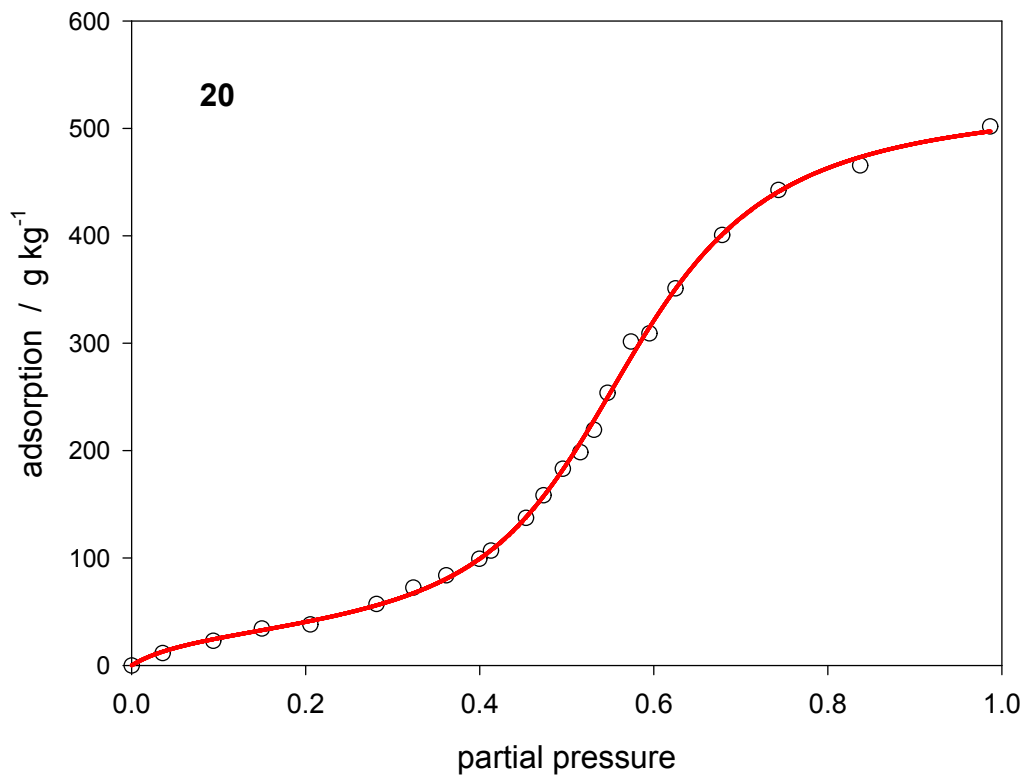

Figure A17: Modeling of the adsorption of water on carbon no. 20 with the Klotz isotherm (eqn. (24)).

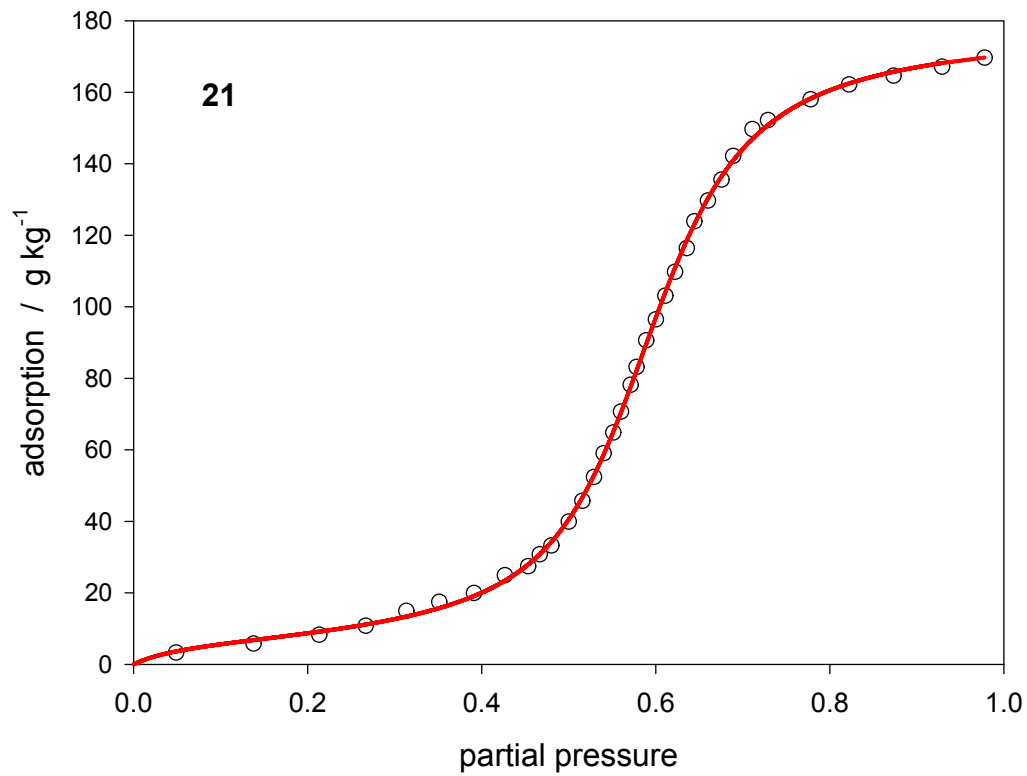

Figure A18: Modeling of the adsorption of water on carbon no. 21 with the Klotz isotherm (eqn. (24)).

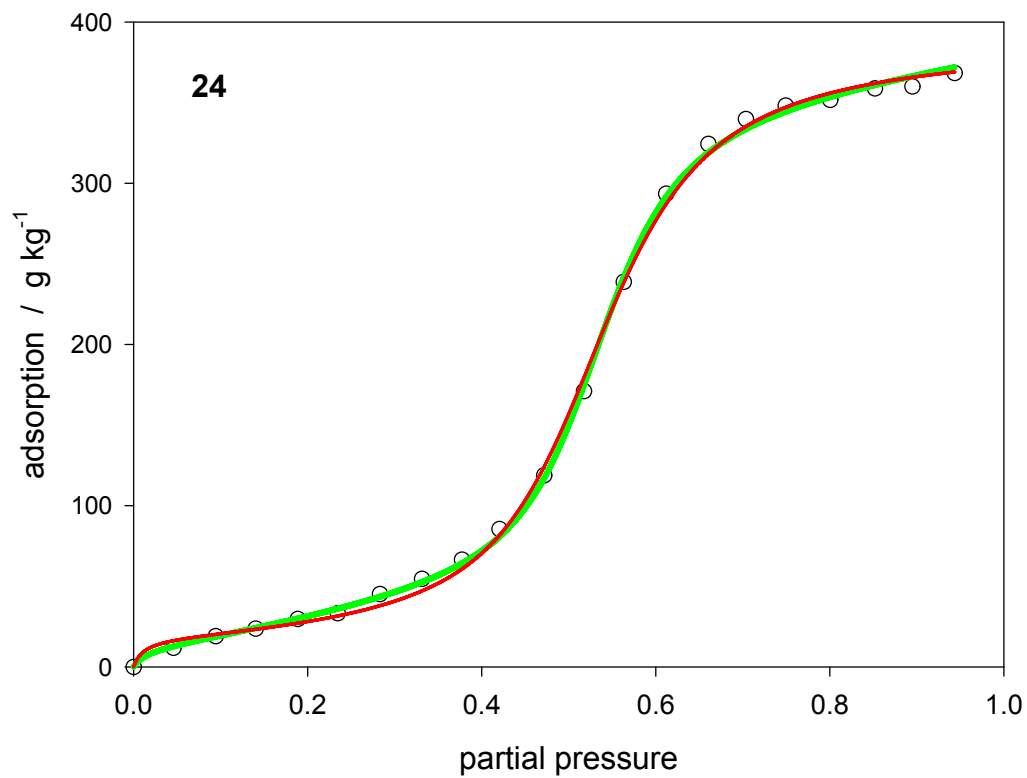

Figure A19: Modeling of the adsorption of water on carbon no. 24 with the Klotz isotherm (eqn. (24)), green line: modeled with eqn. (31)

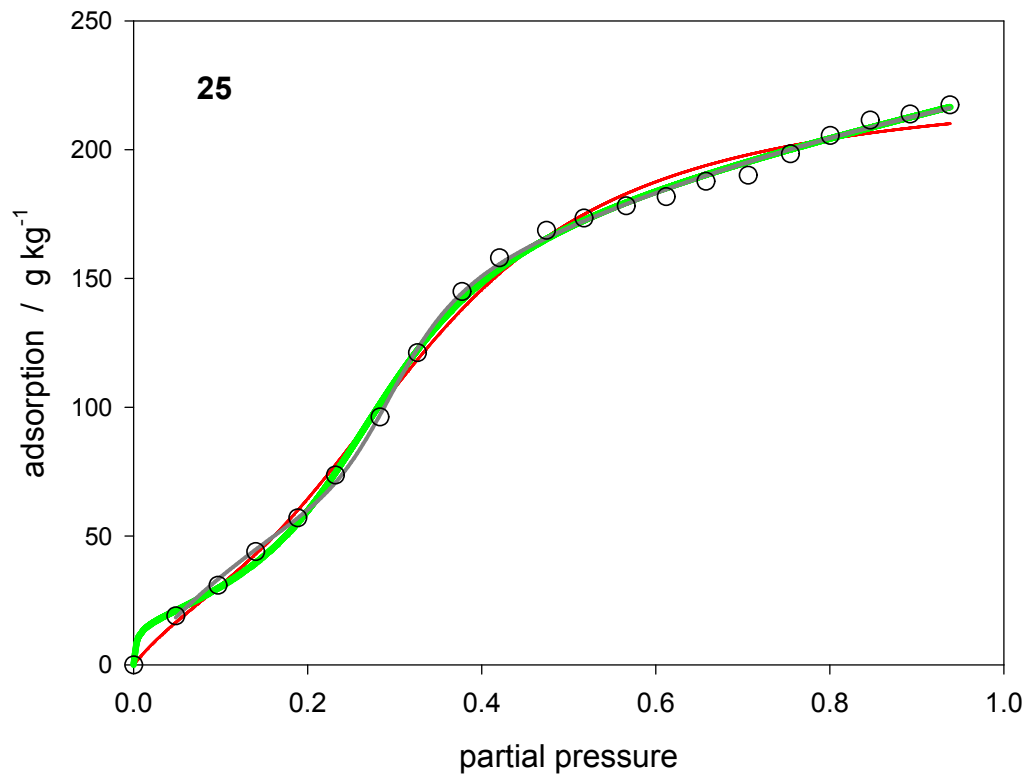

Figure A20: Modeling of the adsorption of water on carbon no. 25 with the Klotz isotherm (eqn. (24)), green line: modeled with eqn. (31); gray line modeling with DD (eqn. (30)).

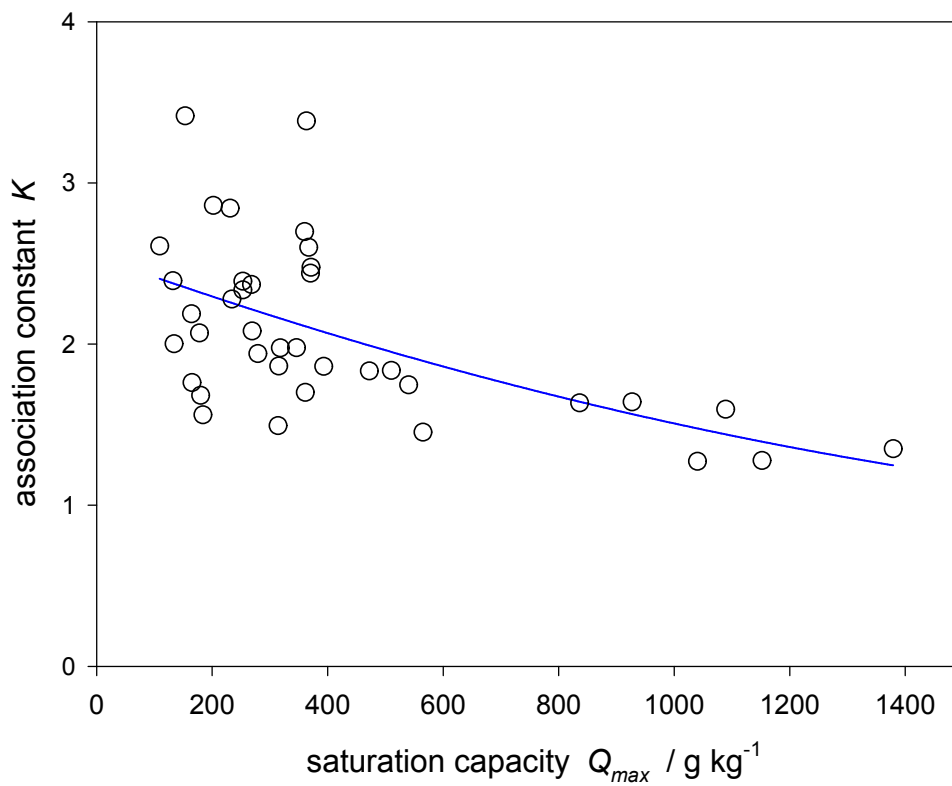

Figure A21: Correlation between  $K$  and  $Q_{max}$  (all values of Table 1).

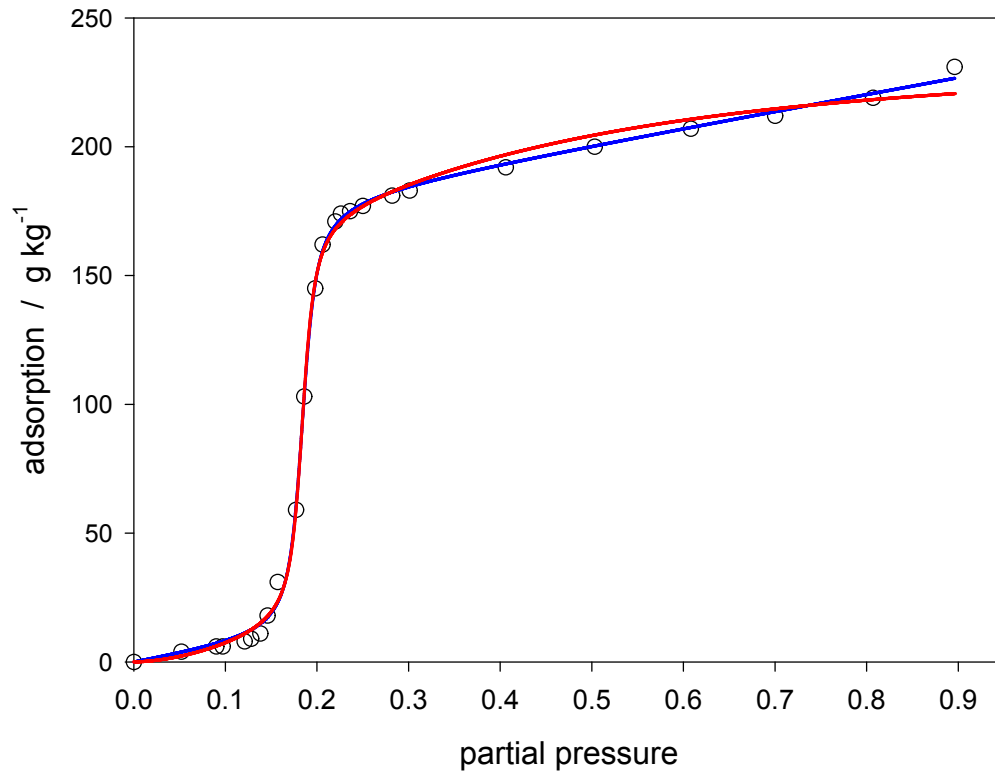

Figure A22: Modeling of the adsorption of water on an ferro aluminophosphate molecular sieve (No. 28 in Table 1) at 25°C. Blue: extended Klotz isotherm (eqn. (31)). Red: additive superposition of the original Klotz isotherm (eqn. (24)) with the part of the Sips-isotherm used in the fitting of the same underlying data by the "universal isotherm" [50].

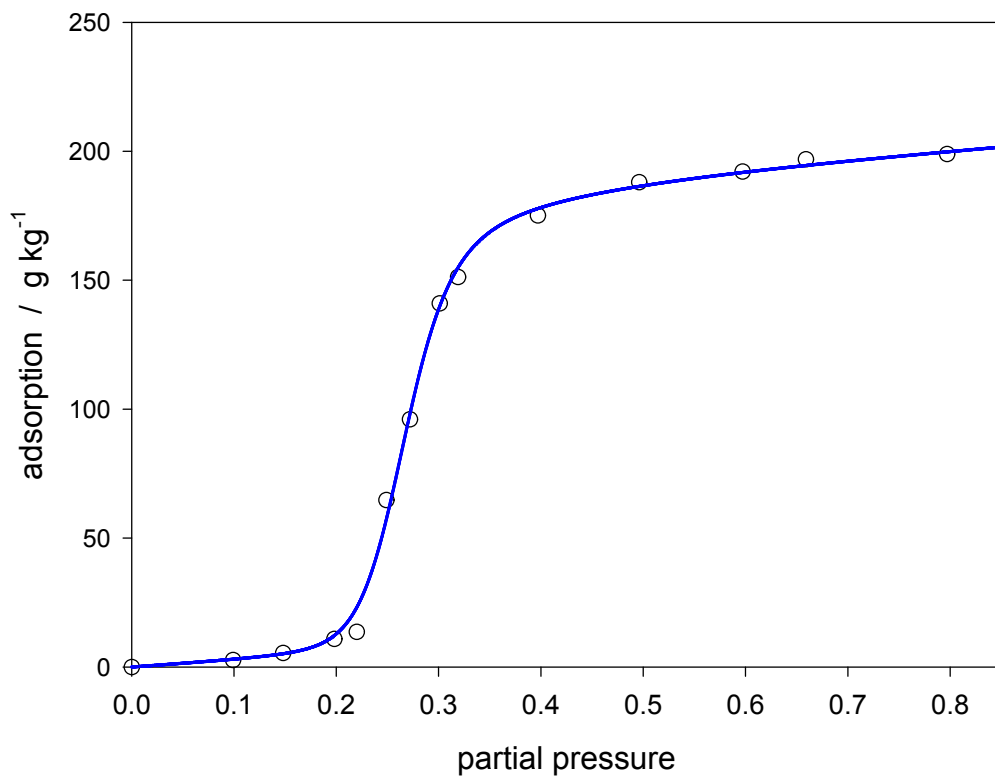

Figure A23: Modeling of the adsorption of water on ferro aluminophosphate molecular sieve (No. 29 in Table 1) at 60°C by the extended Klotz isotherm (eqn. (31))

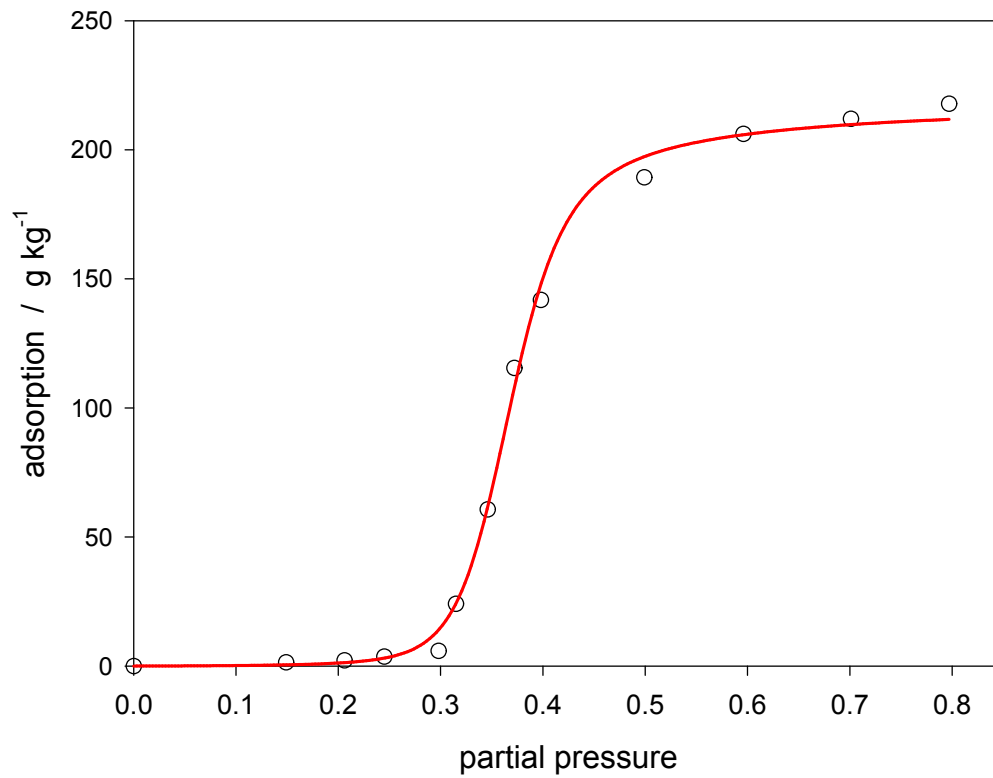

Figure A24: Modeling of the adsorption of water on aluminophosphate molecular sieve (No. 30 in Table 1) at 45°C by the Klotz isotherm (eqn. (24)).

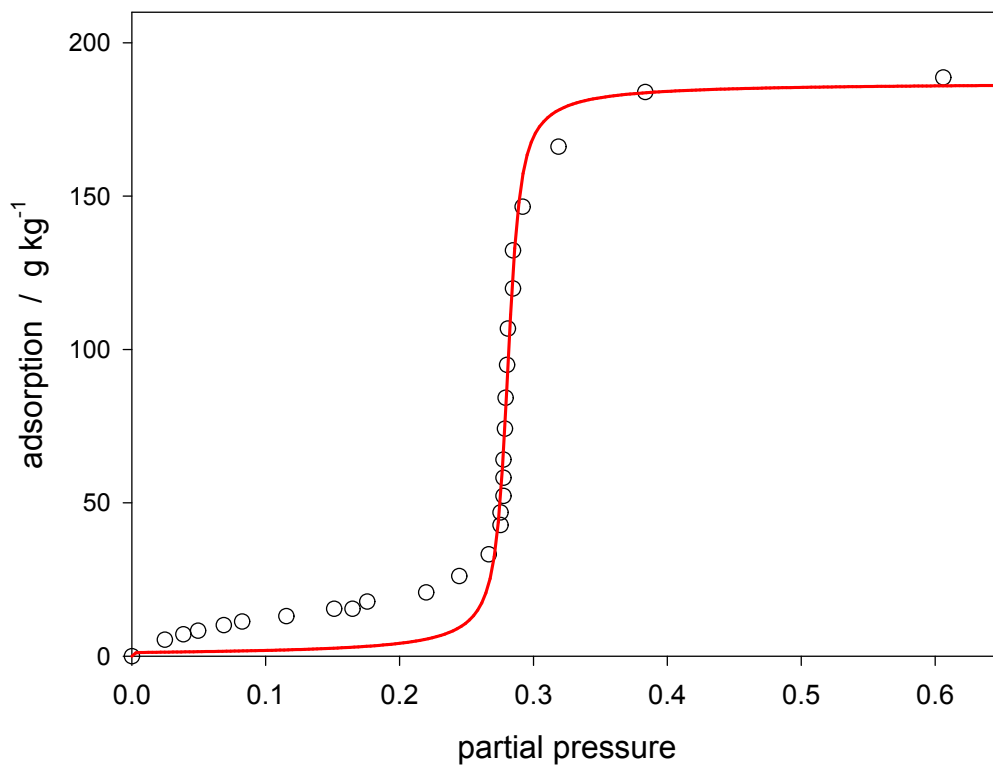

Figure A25: Unsuccessful fitting of the adsorption of water on aluminophosphate molecular sieve AIP<sub>0</sub><sub>4</sub>-5 (AFI-structure) [6] by the Klotz isotherm (eqn.(24)).
